# Supplementary material for: PerSEveML: a web-based tool to identify persistent biomarker structure for rare events using an integrative machine learning approach
Source: Royal Society of Chemistry journal article supplement (doi:10.1039/d4mo00008k), 2024-04-16
Supplement: d4mo00008k1.pdf [file d4mo00008k1.pdf]

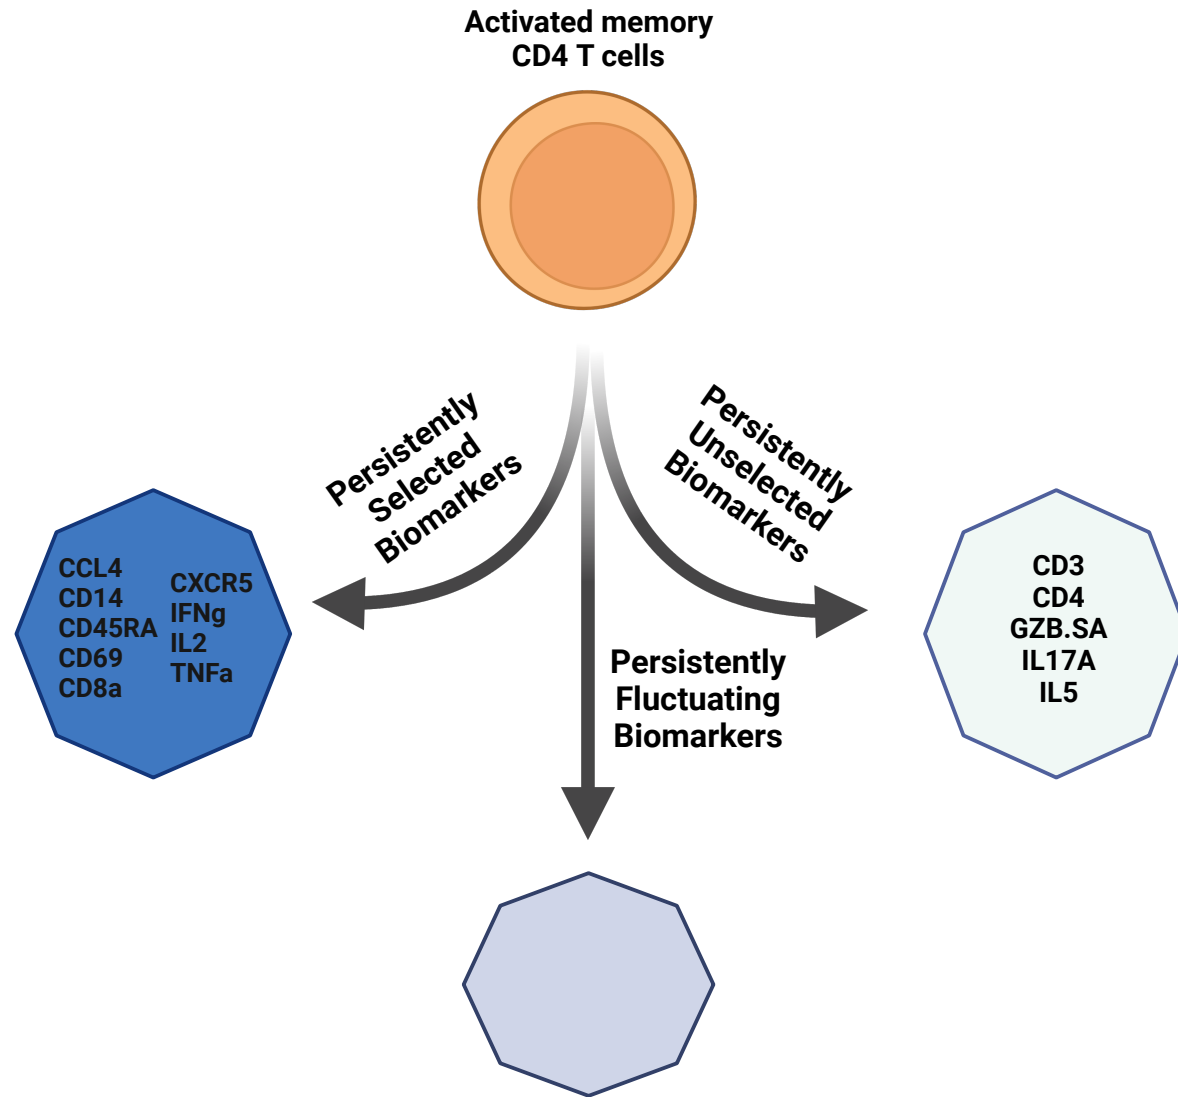

**Figure S1:** Persistent feature (or biomarker) structure calculated on SMOTE incorporated percentage row normalized Mosmann rare data with 80:20 split, 5-fold cross-validation, and 40% cut-off for cut-point analysis using two ML models: XgBoost and naïve Bayes.
